# Supplementary material
Source: publisher figshare collection journal article supplement (https://acs.figshare.com/ndownloader/files/3739207)
Supplement: Supplementary file 1 [file 3739207]

## Supporting Information

### **Supramolecular Polymer Networks made by Solvent-Free Copolymerization of a Liquid 2-Ureido-4[1*H*]pyrimidinone Methacrylamide**

Christian Heinzmann,<sup>1</sup> Iris Lamparth,<sup>2</sup> Kai Rist,<sup>2</sup> Nibert Moszner,<sup>2</sup> Gina L. Fiore,<sup>1</sup> and  
Christoph Weder<sup>1,\*</sup>

<sup>1</sup>*Adolphe Merkle Institute, University of Fribourg, Chemin des Verdiers 4, CH-1700  
Fribourg, Switzerland*

<sup>2</sup>*Ivoclar Vivadent AG, Bendererstrasse 2, FL-9494 Schaan, Liechtenstein*

\*To whom correspondence should be addressed, Email: christoph.weder@unifr.ch

## Table of contents

|                                                                                                                       |    |
|-----------------------------------------------------------------------------------------------------------------------|----|
| Determination of the UPy concentration of the copolymers by the Fox equation                                          | 3  |
| Table S1. Bulk (co)polymerization reactions carried out under thermal initiation                                      | 4  |
| Table S2. Solution (co)polymerization reactions carried out under thermal initiation                                  | 5  |
| Table S3. Solution (co)polymerization reactions carried out under photochemical initiation with HMPP                  | 6  |
| Table S4. Bulk (co)polymerization reactions carried out under photochemical initiation with HMPP at low conversion    | 6  |
| Table S5. Bulk (co)polymerization reactions carried out under photochemical initiation with HMPP at full conversion   | 7  |
| Table S6. Bulk (co)polymerization reactions carried out under photochemical initiation with HMPP between quartz glass | 7  |
| Table S7. Determination of UPy-OPG-MAA content by elemental analysis                                                  | 8  |
| Figure S1. <sup>1</sup> H-NMR and ESI-MS spectra of UPy-OPG                                                           | 9  |
| Figure S2. <sup>1</sup> H-NMR and <sup>13</sup> C-NMR spectra of UPy-OPG-MAA                                          | 10 |
| Figure S3. HR-MS and ESI-MS spectra of UPy-OPG-MAA                                                                    | 11 |
| Figure S4. DSC and TGA traces of UPy-OPG-MAA                                                                          | 12 |
| Figure S5. Picture of miscibility test of UPy-OPG-MAA with methacrylic monomers                                       | 13 |
| Figure S6. Pictures of a PTFE Petri dish and a polymer sample                                                         | 13 |
| Figure S7. <sup>1</sup> H-NMR spectrum of poly(hexyl methacrylate) in CDCl <sub>3</sub>                               | 14 |
| Figure S8. <sup>1</sup> H-NMR spectrum of 5 mol % UPy poly(UPy-OPG-MAA- <i>co</i> -HMA)                               | 14 |
| Figure S9. <sup>1</sup> H-NMR spectrum of 10 mol % UPy poly(UPy-OPG-MAA- <i>co</i> -HMA)                              | 15 |
| Figure S10. <sup>1</sup> H-NMR spectrum of 20 mol % UPy poly(UPy-OPG-MAA- <i>co</i> -HMA)                             | 15 |
| Figure S11. TGA traces of poly(UPy-OPG-MAA- <i>co</i> -HMA)                                                           | 16 |
| Figure S12. SEC measurements of poly(UPy-OPG-MAA- <i>co</i> -HMA) in THF                                              | 17 |
| Figure S13. Pictures of lap joints bonded with poly(UPy-OPG-MAA- <i>co</i> -HMA)                                      | 18 |
| Figure S14. UV-Vis absorbance spectra and temperature-time-diagram                                                    | 19 |

**Determination of the UPy-OPG-MAA content in the copolymers by the Fox equation.**

The Fox equation (1) can be used to determine the weight fractions ( $w_1$  and  $w_2$ ) of two monomers in a copolymer from its glass transition temperature ( $T_g$ ) if the glass transition temperatures of the corresponding homopolymers ( $T_{g,1}$  and  $T_{g,2}$ ) are known:

$$\frac{1}{T_g} = \frac{w_1}{T_{g,1}} + \frac{w_2}{T_{g,2}} \quad (1)$$

This was applied to copolymers made from hexyl methacrylate and UPy-OPG-MAA. The glass transition temperatures of poly(UPy-OPG-MAA) ( $T_{g,1} = 318$  K) and poly(hexyl methacrylate) (poly(HMA)) ( $T_{g,2} = 267$  K) were both determined by DSC measurements (**Figure 2** in the manuscript). With

$$w_2 = 1 - w_1 \quad (2)$$

equation (1) can be re-formulated to:

$$\left( \frac{1}{T_g} - \frac{1-w_1}{T_{g,2}} \right) T_{g,1} = w_1 \quad (3)$$

and numerical analysis permits calculating  $w_1$  (weight fraction of UPy-OPG-MAA) from the experimentally determined  $T_g$ ,  $T_{g,1}$  and  $T_{g,2}$ , which can be converted into mol % by:

$$n_1 = \frac{\frac{w_1}{M_1}}{\frac{w_1}{M_1} + \frac{1-w_1}{M_2}} \quad (4)$$

where  $n_1$  is the mol-fraction of UPy-OPG-MAA and  $M_1$  and  $M_2$  are the molecular weights of UPy-OPG-MAA and HMA, respectively.

**Table S1.** Bulk (co)polymerization reactions carried out under thermal initiation with AIBN.

| UPy-OPG-MAA | Comonomer <sup>a</sup> | Initiator <sup>b</sup> | Temperature | Time | Yield | Solubility <sup>c</sup> | Processability <sup>d</sup> |
|-------------|------------------------|------------------------|-------------|------|-------|-------------------------|-----------------------------|
| (mol %)     | (wt %)                 | (mol %)                | (mol %)     | (°C) | (h)   | (wt %)                  |                             |
| 100         | 100                    | 0                      | 0.5         | 70   | 1.25  | < 1                     | no                          |
| 100         | 100                    | 0                      | 1           | 70   | 6     | 1.6                     | no                          |
| 100         | 100                    | 0                      | 5           | 75   | 1     | < 10                    | no                          |
| 100         | 100                    | 0                      | 2.5         | 75   | 16    | > 20                    | no                          |
| 0           | 0                      | 100 (BMA)              | 0.25        | 70   | 1.5   | > 30                    | DMF and CHCl <sub>3</sub>   |
| 0           | 0                      | 100 (HMA)              | 1           | 70   | 1.5   | > 40                    | CHCl <sub>3</sub>           |
| 0           | 0                      | 100 (HMA)              | 1           | 70   | 2     | 33                      | CHCl <sub>3</sub>           |
| 2.5         | 10                     | 97.5 (BMA)             | 0.5         | 70   | 2.5   | 36                      | no                          |
| 5           | 29                     | 95 (MA)                | 0.5         | 80   | 5     | < 2                     | hot DMF                     |
| 5           | 16                     | 95 (BnMA)              | 1           | 80   | 2     | < 90                    | hot CHCl <sub>3</sub>       |
| 5           | 17                     | 95 (HMA)               | 0.25        | 70   | 6     | 28                      | DMF and CHCl <sub>3</sub>   |
| 5           | 19                     | 95 (BMA)               | 0.25        | 70   | 1     | 5                       | DMF and CHCl <sub>3</sub>   |
| 5           | 19                     | 95 (BMA)               | 0.25        | 70   | 2     | > 20                    | DMF and CHCl <sub>3</sub>   |
| 5           | 19                     | 95 (BMA)               | 0.5         | 70   | 2     | 52                      | no                          |
| 10          | 34                     | 90 (BMA)               | 0.5         | 70   | 1.5   | 37                      | no                          |
| 50          | 79                     | 50 (HMA)               | 1           | 70   | 2     | < 5                     | no                          |
| 50          | 79                     | 50 (HMA)               | 2           | 70   | 4     | < 2                     | no                          |
| 50          | 79                     | 50 (HMA)               | 5           | 70   | 2     | < 2                     | no                          |

<sup>a</sup>Four different comonomers were used: butyl methacrylate (BMA), hexyl methacrylate (HMA), benzyl methacrylate (BnMA), and methyl acrylate (MA). <sup>b</sup>Azobisisobutyronitrile (AIBN) was used as initiator. <sup>c</sup>Solubility was tested in (hot) CHCl<sub>3</sub> and DMF (c < 1 mg/mL). <sup>d</sup>Melt-processability was qualitatively explored by testing if the product could be compression-molded with a Carver® hot-press into a film upon heating up to 140 °C.

**Table S2.** Solution (co)polymerization reactions carried out under thermal initiation with AIBN.

| UPy-OPG-MAA |        | Comonomer <sup>a</sup> | Initiator <sup>b</sup> | Solvent            | Temperature | Time  | Yield  | Solubility <sup>d</sup>       | Processability <sup>e</sup> |
|-------------|--------|------------------------|------------------------|--------------------|-------------|-------|--------|-------------------------------|-----------------------------|
| (mol %)     | (wt %) | (mol %)                | (mol %)                | ([c]) <sup>c</sup> | (°C)        | (min) | (wt %) |                               |                             |
| 5           | 17     | 95 (HMA)               | 2.5                    | 5 (DMF)            | 80          | 21.5  | 32     | DMF and CHCl <sub>3</sub>     | yes                         |
| 10          | 30     | 90 (HMA)               | 2.5                    | 5 (DMF)            | 80          | 21.5  | 0.6    | DMF and CHCl <sub>3</sub>     | yes                         |
| 50          | 79     | 50 (HMA)               | 2.5                    | 40 (DMF)           | 70          | 15.5  | 32     | hot DMF                       | yes                         |
| 50          | 79     | 50 (HMA)               | 1                      | 21 (DMF)           | 80          | 5     | 4      | no                            | no                          |
| 50          | 79     | 50 (HMA)               | 5                      | 21 (DMF)           | 80          | 24    | 18     | no                            | no                          |
| 100         | 100    | 0                      | 1                      | 11 (DMF)           | 80          | 5     | 2      | no                            | no                          |
| 100         | 100    | 0                      | 1                      | 17 (DMF)           | 80          | 22.5  | < 1    | no                            | no                          |
| 100         | 100    | 0                      | 2.5                    | 5 (DMF)            | 80          | 1     | 0.5    | no                            | no                          |
| 5           | 17     | 95 (HMA)               | 2.5                    | 22 (tol)           | 80          | 6     | 68     | CHCl <sub>3</sub>             | yes                         |
| 50          | 78     | 50 (BnMA)              | 2.5                    | 22 (tol)           | 70          | 6     | 1.9    | no                            | yes                         |
| 50          | 79     | 50 (HMA)               | 2.5                    | 22 (tol)           | 80          | 6     | 44     | hot DMF and CHCl <sub>3</sub> | yes                         |
| 50          | 82     | 50 (BMA)               | 2.5                    | 22 (tol)           | 80          | 5     | 46     | hot DMF                       | yes                         |
| 100         | 100    | 0                      | 2.5                    | 22 (tol)           | 80          | 8     | 36     | hot DMF                       | yes                         |

Either DMF or toluene (tol) were used as solvent. <sup>a</sup>Three different monomers were employed: butyl methacrylate (BMA), benzyl methacrylate (BnMA), and hexyl methacrylate (HMA). <sup>b</sup>Azobisisobutyronitrile (AIBN) was used as initiator. <sup>c</sup>Total monomer concentration in wt %. <sup>d</sup>Solubility was tested in (hot) CHCl<sub>3</sub> and DMF (c < 1 mg/mL). <sup>e</sup>Melt-processability was qualitatively explored by testing if the product could be compression-molded with a Carver® hot-press into a film upon heating up to 140 °C.

**Table S3.** Solution (co)polymerization reactions carried out under photochemical initiation with HMPP.

| UPy-OPG-MAA |        | Hexyl-MA | Initiator <sup>a</sup> | Toluene       | Time  | Yield  | Solubility <sup>b</sup> | Processability <sup>c</sup> |
|-------------|--------|----------|------------------------|---------------|-------|--------|-------------------------|-----------------------------|
| (mol %)     | (wt %) | (mol %)  | (mol %)                | ([c] in wt %) | (min) | (wt %) |                         |                             |
| 10          | 30     | 90       | 1.5                    | 20            | 45    | > 28   | CHCl <sub>3</sub>       | yes                         |
| 100         | 100    | 0        | 1.5                    | 53            | 1     | 10     | swelling in hot DMF     | yes                         |
| 100         | 100    | 0        | 1.5                    | 53            | 0.5   | 4      | swelling in hot DMF     | yes                         |
| 100         | 100    | 0        | 1.5                    | 20            | 10    | > 15   | no                      | yes                         |
| 100         | 100    | 0        | 1.5                    | 53            | 3     | 28     | no                      | no                          |

<sup>a</sup>2-Hydroxy-2-methyl-1-phenyl-propan-1-one was used as initiator. <sup>b</sup>Solubility was tested in (hot) DMF, and CHCl<sub>3</sub> (c < 1 mg/mL). <sup>c</sup>Melt-processability was qualitatively explored by testing if the product could be compression-molded with a Carver® hot-press into a film upon heating up to 80 °C.

**Table S4.** Bulk (co)polymerization reactions carried out under photochemical initiation with HMPP and low conversion.

| Entry | UPy-OPG-MAA |        | HMA <sup>a</sup> | Initiator <sup>b</sup> | Time  | Yield  | Solubility <sup>c</sup>         | Processability <sup>d</sup> |
|-------|-------------|--------|------------------|------------------------|-------|--------|---------------------------------|-----------------------------|
|       | (mol %)     | (wt %) | (mol %)          | (mol %)                | (min) | (wt %) |                                 |                             |
| 34    | 0           | 0      | 100              | 1.5                    | 15    | 40     | THF, CHCl <sub>3</sub>          | yes                         |
| 37    | 5           | 17     | 95               | 1.5                    | 15    | 49     | THF, DMF, and CHCl <sub>3</sub> | yes                         |
| 41    | 10          | 30     | 90               | 1.5                    | 8.5   | 32     | THF, DMF, and CHCl <sub>3</sub> | yes                         |
| 44    | 20          | 49     | 80               | 1.5                    | 4.5   | 49     | THF, DMF, and CHCl <sub>3</sub> | yes                         |
| C198  | 100         | 100    | 0                | 1.5                    | 2     | 27     | swelling in CHCl <sub>3</sub>   | yes                         |

<sup>a</sup>Hexyl methacrylate. <sup>b</sup>2-Hydroxy-2-methyl-1-phenyl-propan-1-one was used as initiator. <sup>c</sup>Solubility was tested in (hot) THF, DMF, and CHCl<sub>3</sub> (c < 1 mg/mL). <sup>d</sup>Melt-processability was qualitatively explored by testing if the product could be compression-molded with a Carver® hot-press into a film upon heating up to 80 °C.

**Table S5.** Bulk (co)polymerization reactions carried out under photochemical initiation with HMPP and full conversion.

| Entry | UPy-OPG-MAA |        | HMA <sup>a</sup> | Initiator <sup>b</sup> | Time  | Yield        | Solubility <sup>c</sup>           | Processability <sup>d</sup> |
|-------|-------------|--------|------------------|------------------------|-------|--------------|-----------------------------------|-----------------------------|
|       | (mol %)     | (wt %) | (mol %)          | (mol %)                | (min) | (wt %)       |                                   |                             |
| C213  | 0           | 0      | 100              | 1.5                    | 35    | quantitative | THF, CHCl <sub>3</sub>            | yes                         |
| C210  | 5           | 17     | 95               | 1.5                    | 25    | quantitative | swelling in hot CHCl <sub>3</sub> | yes                         |
| C211  | 10          | 30     | 90               | 1.5                    | 18    | quantitative | no                                | no                          |
| C212  | 20          | 49     | 80               | 1.5                    | 10    | quantitative | no                                | no                          |
| C214  | 100         | 100    | 0                | 1.5                    | 8     | quantitative | no                                | no                          |

<sup>a</sup>Hexyl methacrylate. <sup>b</sup>2-Hydroxy-2-methyl-1-phenyl-propan-1-one was used as initiator. <sup>c</sup>Solubility was tested in (hot) THF, DMF, and CHCl<sub>3</sub> (c < 1 mg/mL). <sup>d</sup>Melt-processability was qualitatively explored by testing if the product could be compression-molded with a Carver® hot-press into a film upon heating up to 80 °C.

**Table S6.** Bulk (co)polymerization reactions carried out under photochemical initiation with HMPP between quartz glass.

| Entry | UPy-OPG-MAA |        | HMA <sup>a</sup> | Initiator <sup>b</sup> | LHC <sup>c</sup> | Time  |
|-------|-------------|--------|------------------|------------------------|------------------|-------|
|       | (mol %)     | (wt %) | (mol %)          | (mol %)                | (wt %)           | (min) |
| C215  | 0           | 0      | 100              | 1.5                    | 0                | 24    |
| C216  | 5           | 17     | 95               | 1.5                    | 0                | 15    |
| C217  | 0           | 0      | 100              | 1.5                    | 1                | 43    |
| C219  | 5           | 17     | 95               | 1.5                    | 1                | 28    |

<sup>a</sup>Hexyl methacrylate. <sup>b</sup>2-Hydroxy-2-methyl-1-phenyl-propan-1-one was used as initiator. <sup>c</sup>LHC = light-heat-converter, 2-(5-chloro-2H-benzotriazole-2-yl)-6-(1,1'-dimethylethyl)-4-methyl-phenol.

**Determination of the UPy-OPG-MAA content by elemental analysis.**

Elemental analysis measurements were used to determine the UPy-OPG-MAA concentration in poly(UPy-OPG-MAA-co-HMA). UPy-OPG-MAA is the only nitrogen containing compound of the three used compounds: UPy-OPG-MAA, hexyl methacrylate (HMA) and the photoinitiator (2-Hydroxy-2-methyl-1-phenyl-propan-1-one). To calculate the nitrogen content, the following formula was used:

$$N_{calc} = \frac{x \times N_{UPy-OPG-MAA}}{(x M_{UPy-OPG-MAA} + (100 - x) M_{HMA} + 1.5 M_{Initiator})}$$

With  $x$  = mol % of UPy-OPG-MAA in the feed;  $N_{UPy-OPG-MAA}$  = nitrogen content in UPy-OPG-MAA; and  $M_i$  = molecular weight of the corresponding monomers.

The calculated UPy-OPG-MAA in the polymer is the ratio of  $N_{found}$  by  $N_{calc}$  and can be found in **Table S7**.

**Table S7.** Results from elemental analysis

| Conversion | UPy-OPG-MAA<br>(feed)<br>(mol %) | N<br>(calculated)<br>(%) | N<br>(found)<br>(%) | UPy-OPG-MAA<br>(calculated)<br>(mol %) |
|------------|----------------------------------|--------------------------|---------------------|----------------------------------------|
| low        | 0                                | 0                        | 0                   | 0                                      |
| low        | 5                                | 1.6                      | 0.8                 | 2.5                                    |
| low        | 10                               | 3.0                      | 1.4                 | 4.7                                    |
| low        | 20                               | 5.0                      | 2.7                 | 10.8                                   |
| full       | 0                                | 0                        | 0                   | 0                                      |
| full       | 5                                | 1.7                      | 1.5                 | 4.4                                    |
| full       | 10                               | 3.0                      | 2.7                 | 9.0                                    |
| full       | 20                               | 4.9                      | 4.8                 | 19.6                                   |



(a)

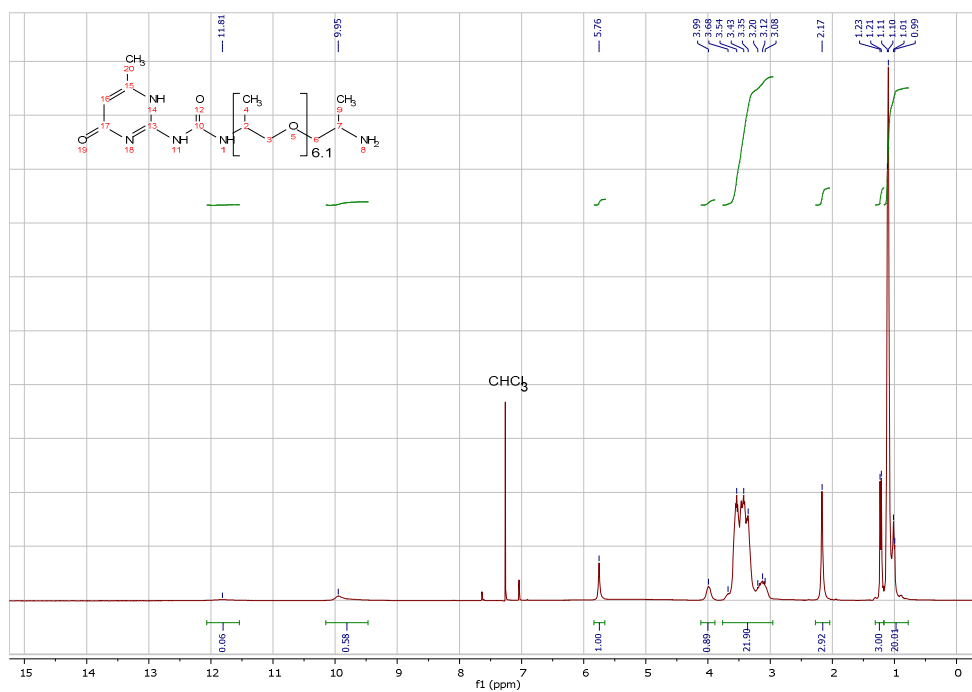

(b)

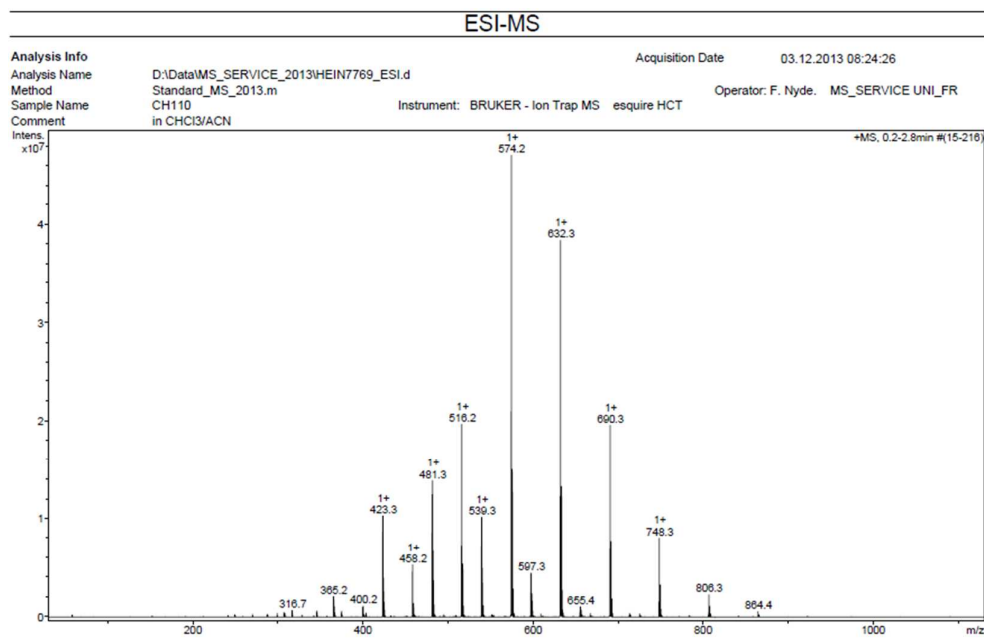

**Figure S1.** <sup>1</sup>H-NMR (a) and ESI-MS (b) spectra of UPy-OPG.

(a)

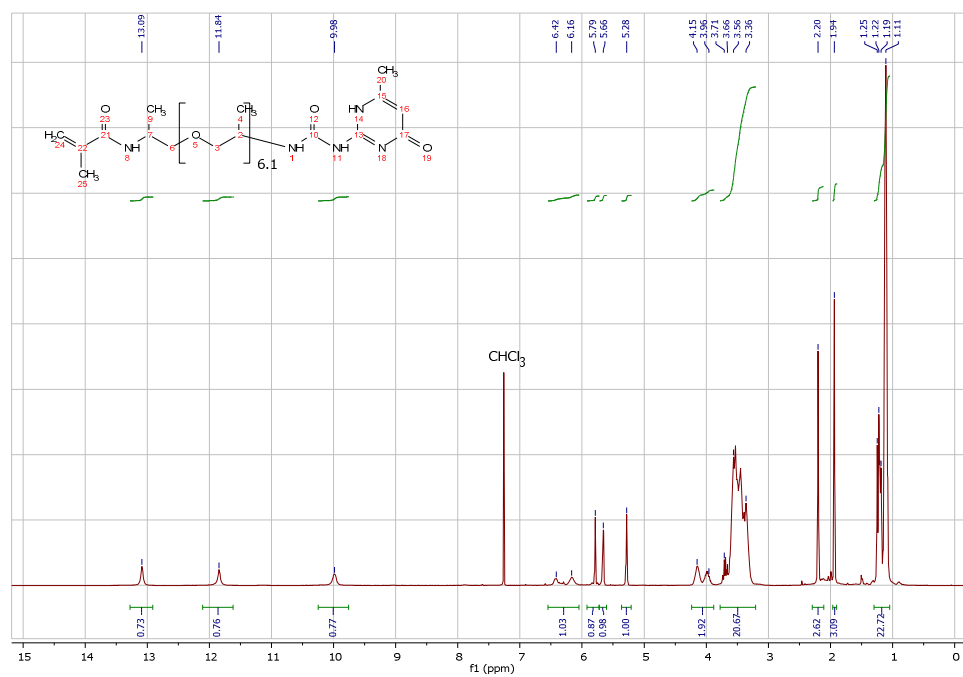

(b)

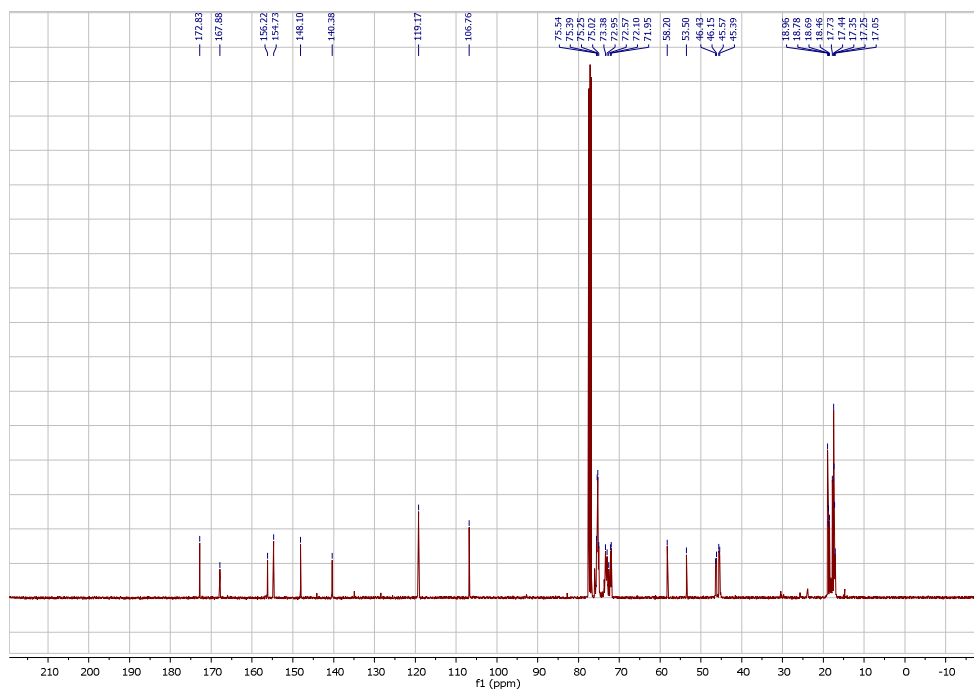

**Figure S2.** <sup>1</sup>H-NMR (a) and <sup>13</sup>C-NMR (b) spectra of UPy-OPG-MAA.

(a)

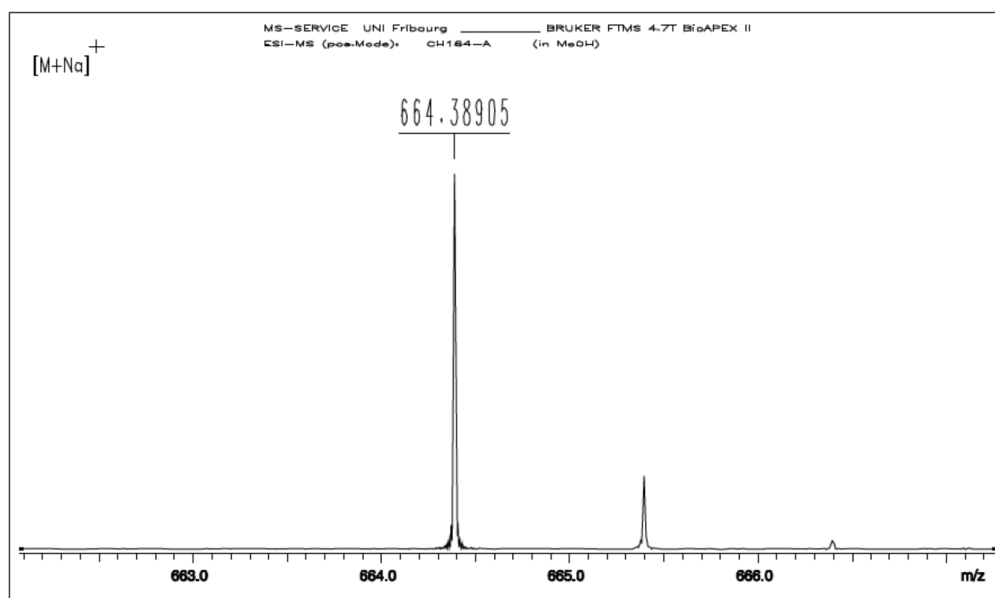

(b)

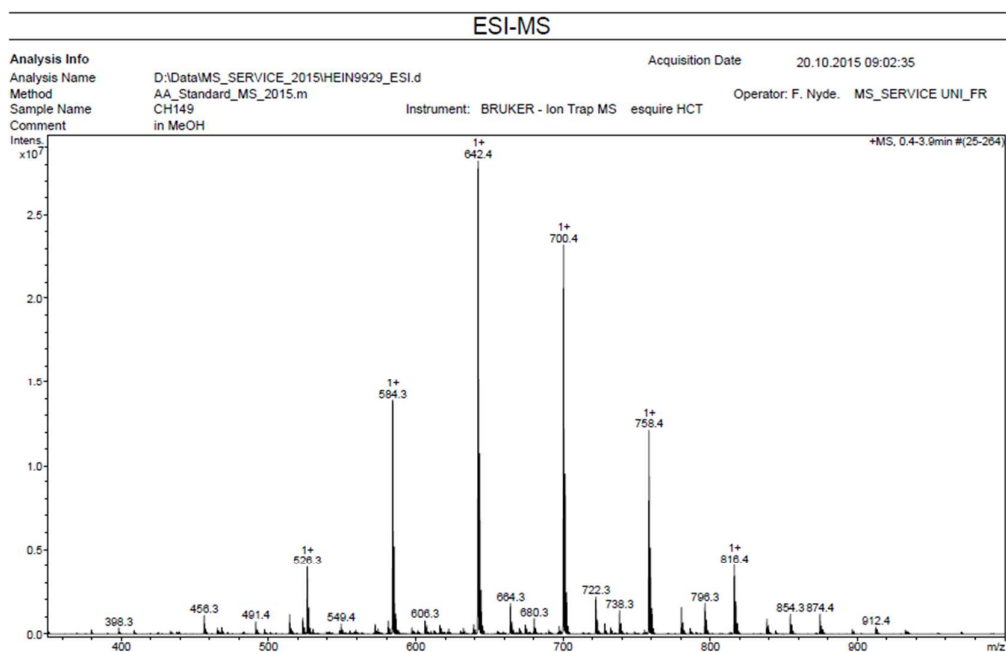

**Figure S3.** HR-MS (a) and ESI-MS (b) spectra of UPy-OPG-MAA.

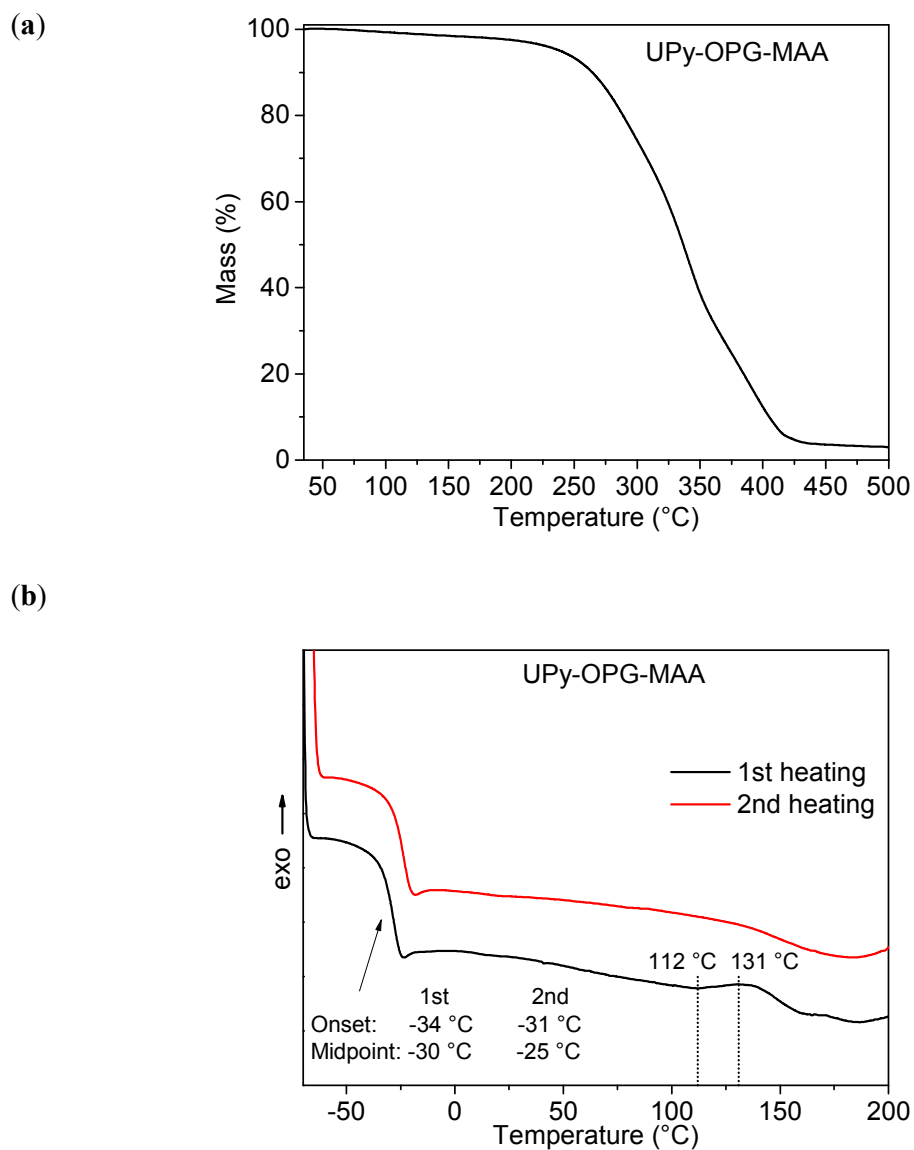

**Figure S4.** TGA (a) and DSC (b) traces of UPy-OPG-MAA.

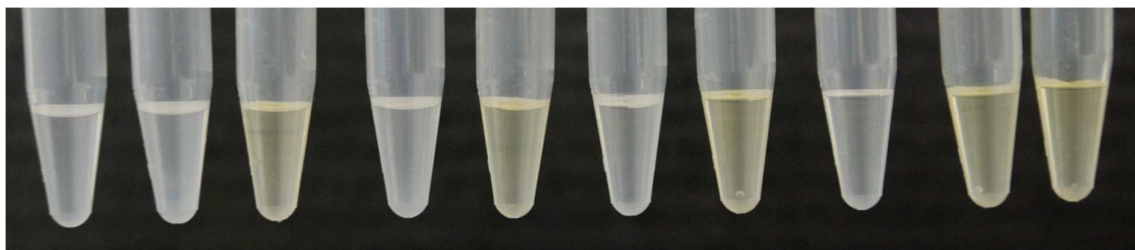

**Figure S5.** Picture of miscibility test of UPy-OPG-MAA with methacrylic monomers in Eppendorf tubes. From left to right: butyl methacrylate (BMA); hexyl methacrylate (HMA) : UPy-OPG-MAA, 10:1; HMA : UPy-OPG-MAA, 1:10; BMA : UPy-OPG-MAA, 10:1; BMA : UPy-OPG-MAA, 1:10; benzyl methacrylate (BnMA) : UPy-OPG-MAA, 10:1; BnMA : UPy-OPG-MAA, 1:10; 2-hydroxyethyl methacrylate (HEMA) : UPy-OPG-MAA, 10:1; HEMA : UPy-OPG-MAA, 1:10; UPy-OPG-MAA. It can be concluded from these data points, that UPy-OPG-MAA is fully miscible in all the tested monomers at any ratio.

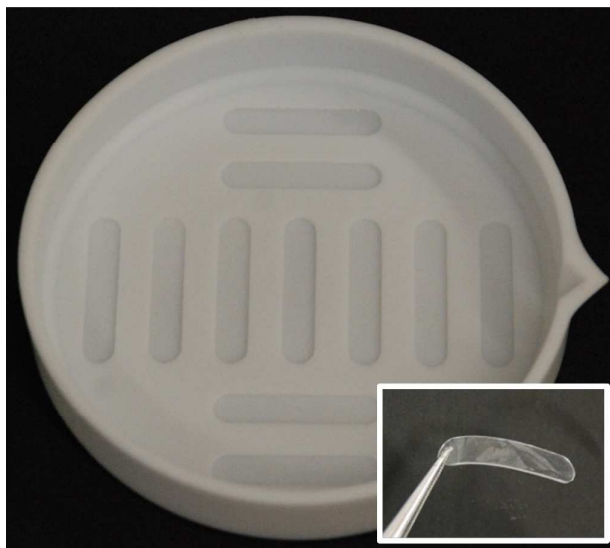

**Figure S6.** Pictures of a poly(tetrafluoro ethylene) (PTFE) mold with sample cavities (30 mm x 5 mm x 0.4 mm) (large picture) and a polymer sample made with this mold (inset).

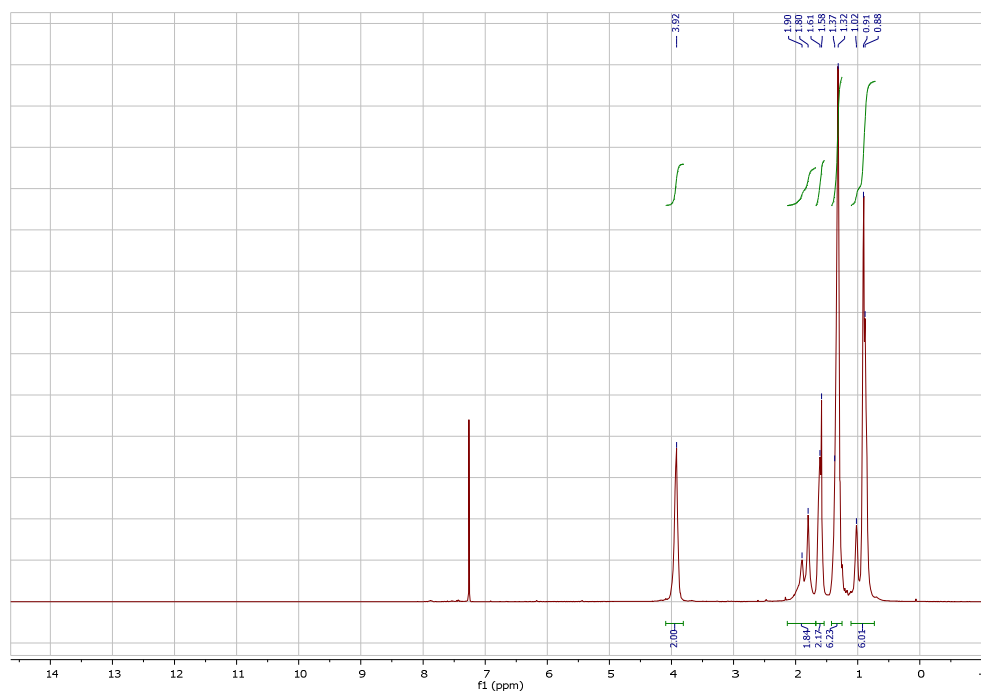

**Figure S7.**  $^1\text{H}$ -NMR spectrum of poly(hexyl methacrylate) in  $\text{CDCl}_3$  (from Table S4).

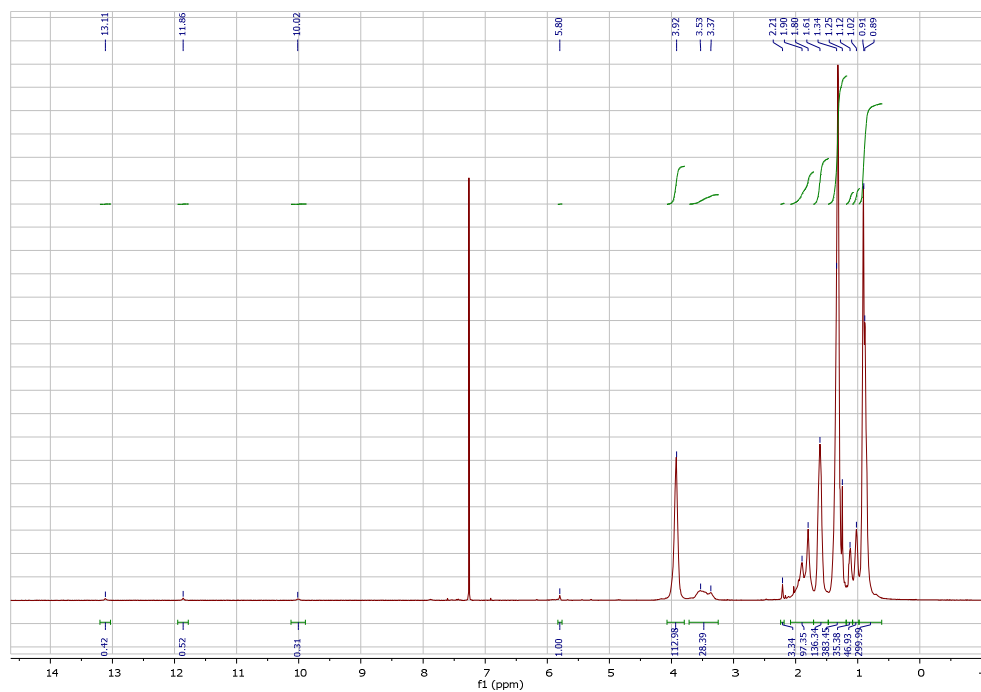

**Figure S8.**  $^1\text{H}$ -NMR spectrum of 5 mol % UPy poly(UPy-OPG-MAA-co-HMA) in  $\text{CDCl}_3$  (from Table S4).

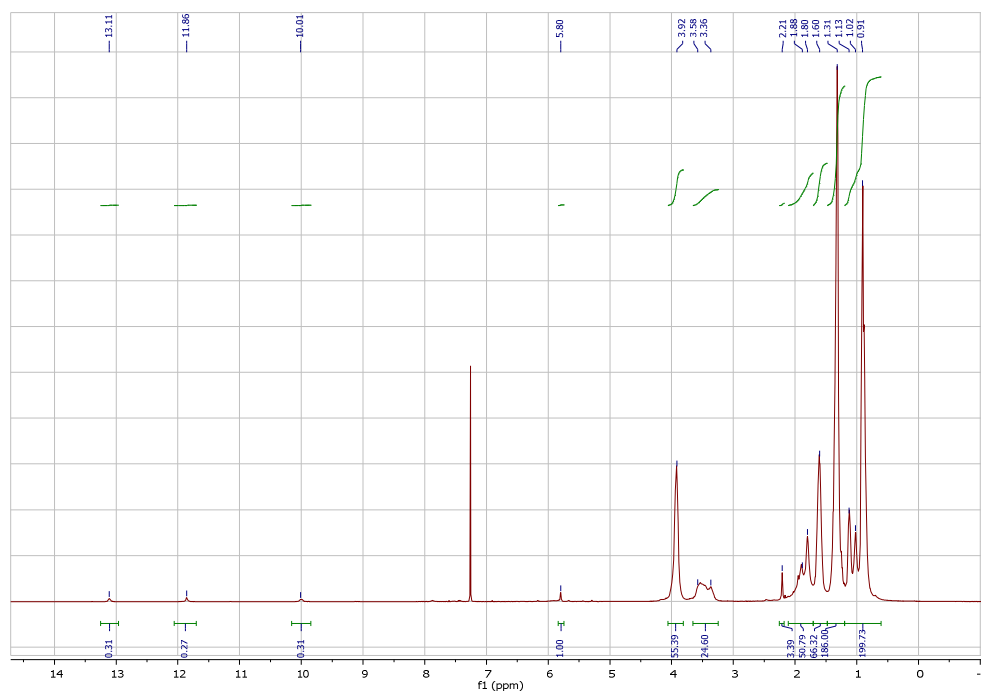

**Figure S9.** <sup>1</sup>H-NMR spectrum of 10 mol % UPy poly(UPy-OPG-MAA-co-HMA) in CDCl<sub>3</sub> (from Table S4).

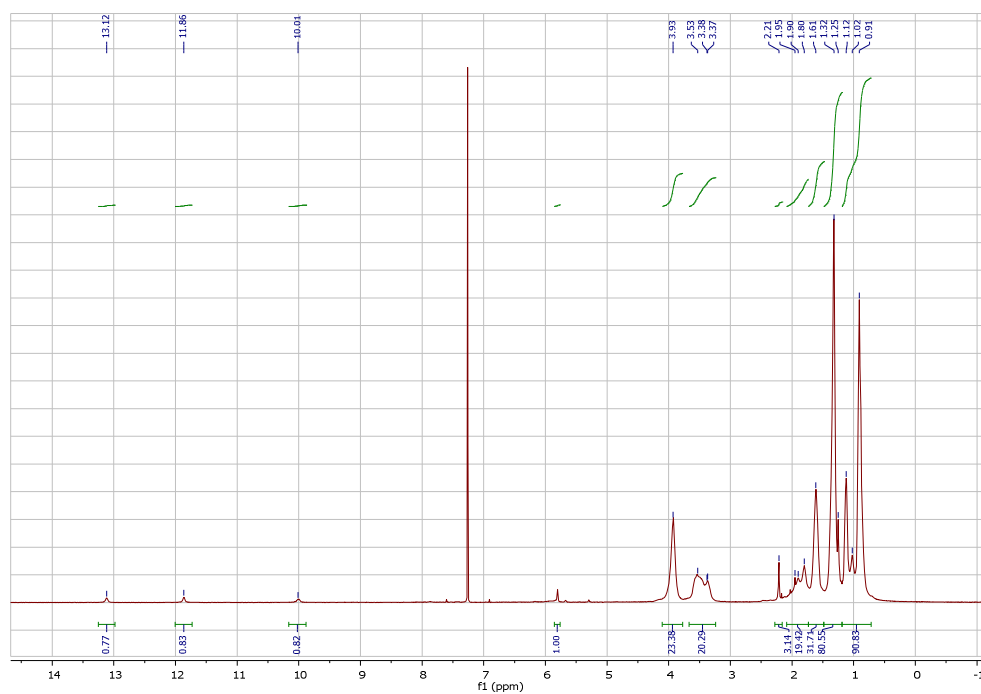

**Figure S10.** <sup>1</sup>H-NMR spectrum of 20 mol % UPy poly(UPy-OPG-MAA-co-HMA) in CDCl<sub>3</sub> (from Table S4).

(a)

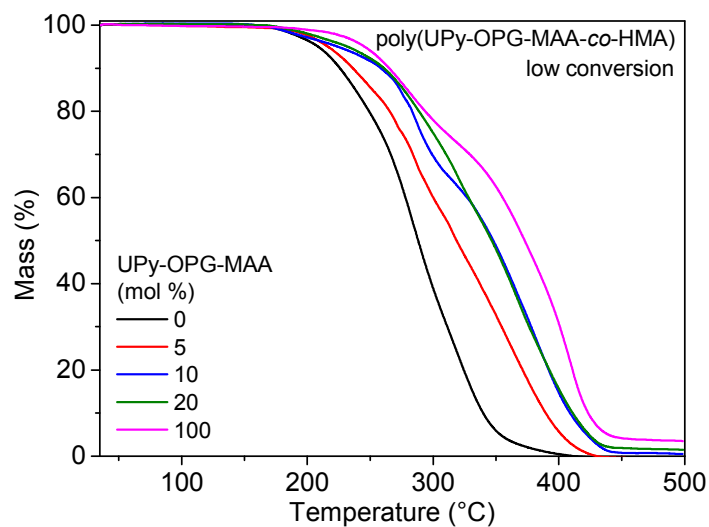

(b)

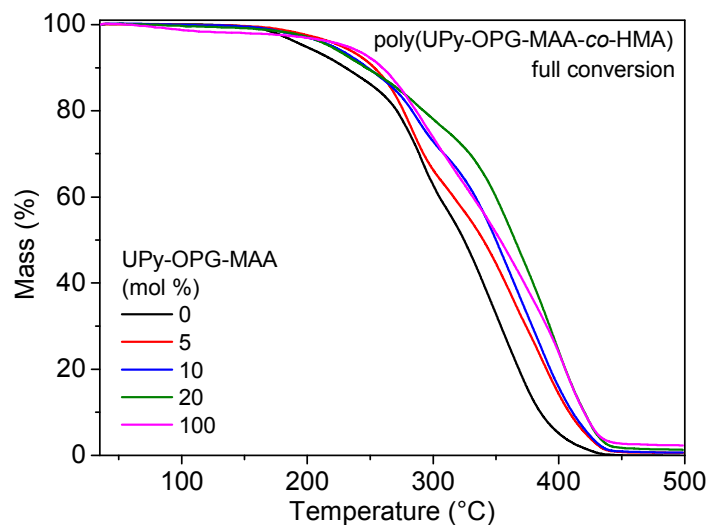

**Figure S11.** TGA traces of poly(UPy-OPG-MAA-co-HMA) at low conversion ((a); see **Table S4**) and full conversion ((b); see **Table S5**). The temperatures at 5 % mass loss are 208 °C (0 mol % UPy-OPG-MAA), 216 °C (5 mol %), 224 °C (10 mol %), 231 °C (20 mol %), and 245 °C (100 mol %) for the low conversion and 198 °C (0 mol %), 227 °C (5 mol %), 220 °C (10 mol %), 218 °C (20 mol %), and 231 °C (100 mol %) for the full conversion.



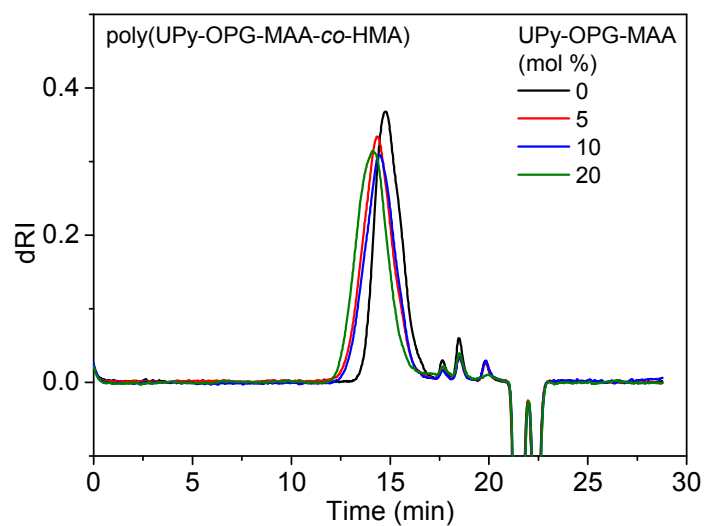

**Figure S12.** Size exclusion chromatography (SEC) measurements of poly(UPy-OPG-MAA-*co*-HMA) (from **Table S4**) in THF. Shown is the differential refractive index (dRI) signal against elution time at a temperature of 40 °C after injecting sample solutions with a concentration of 1 mg/mL.

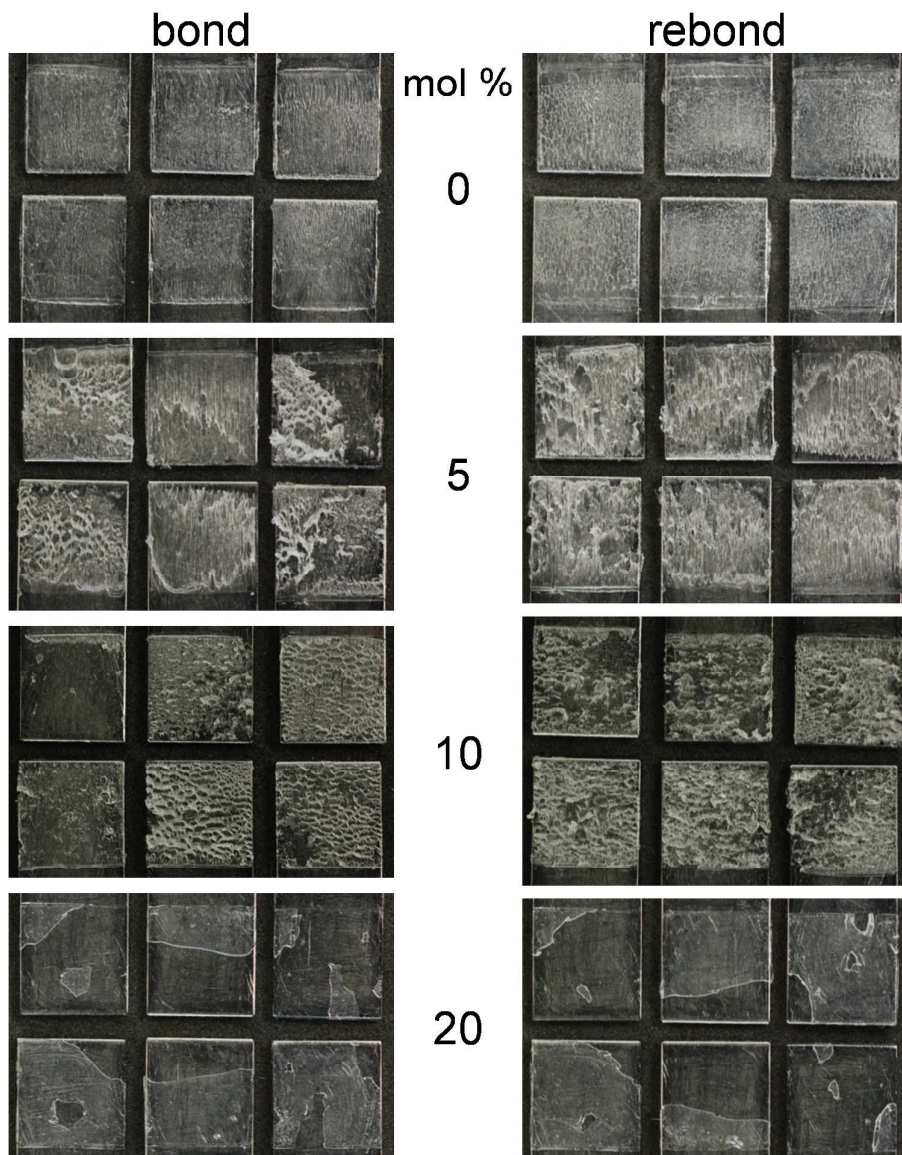

**Figure S13.** Pictures of lap joints bonded with poly(UPy-OPG-MAA-*co*-HMA) (**Table S4**) after shear testing original samples (bond) and samples that had been rebonded after a first shear test with the same bonding conditions (80 °C, 3 min in a preheated oven) (rebond). The UPy-OPG-MAA concentration in mol % is given in the figure.

(a)

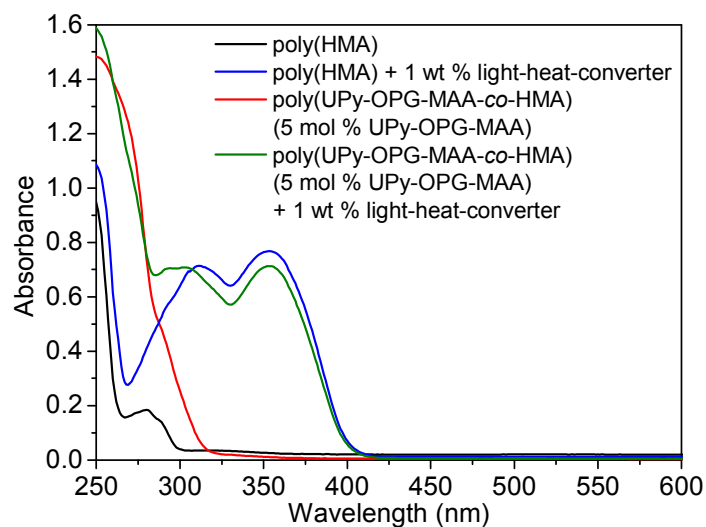

(b)

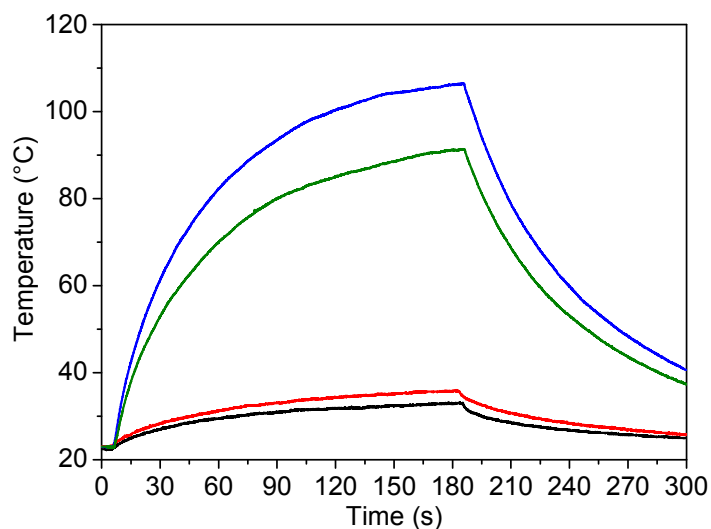

**Figure S14.** a) UV-Vis absorbance spectra of the polymers used for the debond on demand experiments with the polymers from **Table S6** between quartz glass lap joints. b) Temperature-time diagram of the lap joints irradiated with UV light for 3 min ( $\lambda = 320\text{-}390$  nm;  $900\text{ mW/cm}^2$ ). The polymer composition for a) and b) is given in a).
